# Supplementary material for: Effects of doping on photocatalytic water splitting activities of PtS2/SnS2 van der Waals heterostructures
Source: Royal Society of Chemistry journal article supplement (doi:10.1039/d1cp01777b), 2021-01-01

**Supporting information:**

**Effects of doping on photocatalytic water splitting activities  
of PtS<sub>2</sub>/SnS<sub>2</sub> van der Waals heterostructure**

Liang Zhu<sup>a</sup>, Yu-Feng Ding, Wei-Jun Yang<sup>a\*</sup>, Shuang-Feng Yin<sup>a\*</sup>, Meng-Qiu Cai<sup>b\*</sup>

*<sup>a</sup>State Key Laboratory of Chemo/Biosensing and Chemometrics, College of Chemistry and  
Chemical Engineering, Hunan University, Changsha 410082, People's Republic of China*

*<sup>b</sup>School of Physics and electronics Science, Hunan University, Changsha 410082, People's  
Republic of China*

\* E-mail: [jyang@hnu.edu.cn](mailto:jyang@hnu.edu.cn) (W. J. Yang), [sf\\_yin@hnu.edu.cn](mailto:sf_yin@hnu.edu.cn) (S. F. Yin), [mqcai@hnu.edu.cn](mailto:mqcai@hnu.edu.cn)  
(M. Q. Cai),.

**Table S1** The under table shows the crystallographic information and the calculated lattice parameters of PtS<sub>2</sub> and SnS<sub>2</sub> monolayers.

| Compound           | PtS <sub>2</sub>      | SnS <sub>2</sub>       |
|--------------------|-----------------------|------------------------|
| Crystal system     | hexagonal             | hexagonal              |
| a (Å)              | 3.572                 | 3.699                  |
| b (Å)              | 3.572                 | 3.699                  |
| $\alpha$ (°)       | 90                    | 90                     |
| $\beta$ (°)        | 90                    | 90                     |
| $\gamma$ (°)       | 120                   | 120                    |
| reference data (Å) | a=b=3.55 <sup>1</sup> | a=b=3.698 <sup>2</sup> |

1. S. U. Rehman, B. Amin, M. Hafeez, S. A. Khan, I. A. Mir, W. Uddin, L. Wei and L. Zhu, *Appl. Surf. Sci.*, 2020, **505**, 144530.
2. C. Xia, J. Du, M. Li, X. Li, X. Zhao, T. Wang and J. Li, *Phys. Rev. Appl.*, 2018, **10**.

Fig. S1 Energy tests of PtS<sub>2</sub>/SnS<sub>2</sub> vdWHs for interlayer spacing (a) and density of k-mesh (b).

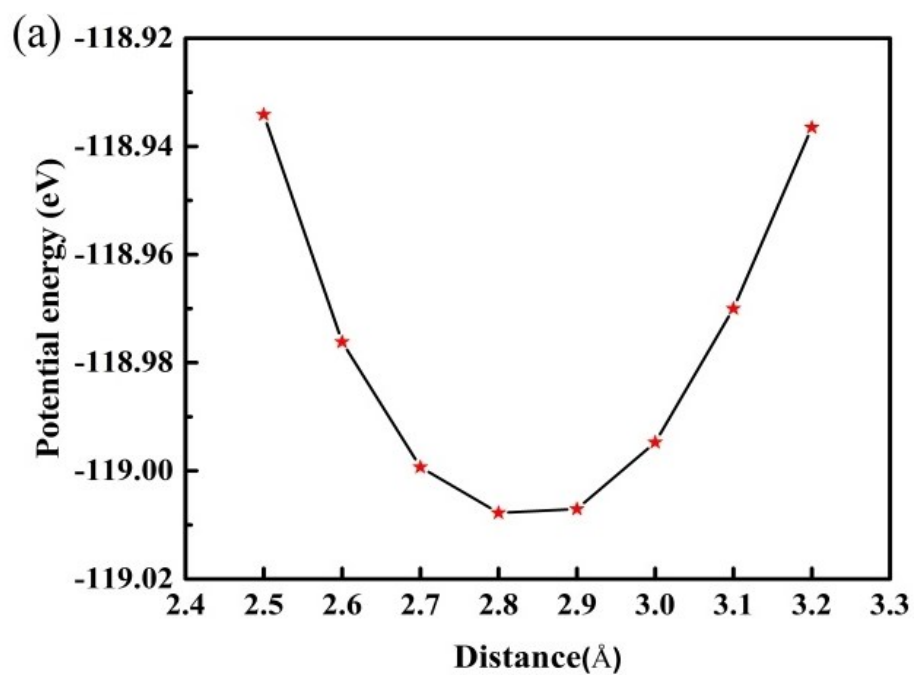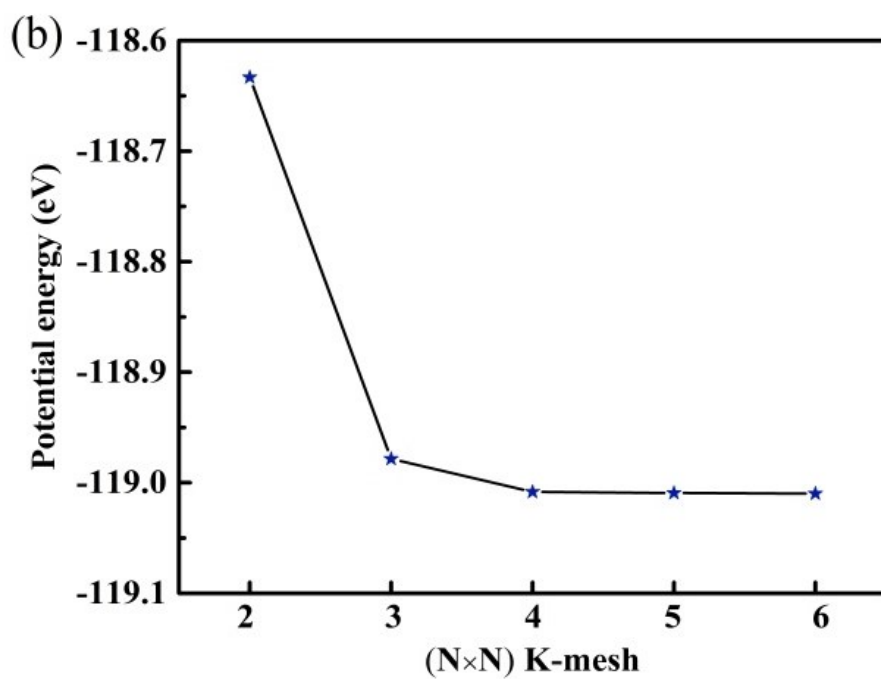

Fig. S2 (a) calculated phonon spectrum of PtS<sub>2</sub>/SnS<sub>2</sub> vdW heterojunction. (b) free energy changes with simulated time in the AIMD trajectory in PtS<sub>2</sub>/SnS<sub>2</sub> vdW heterojunction.

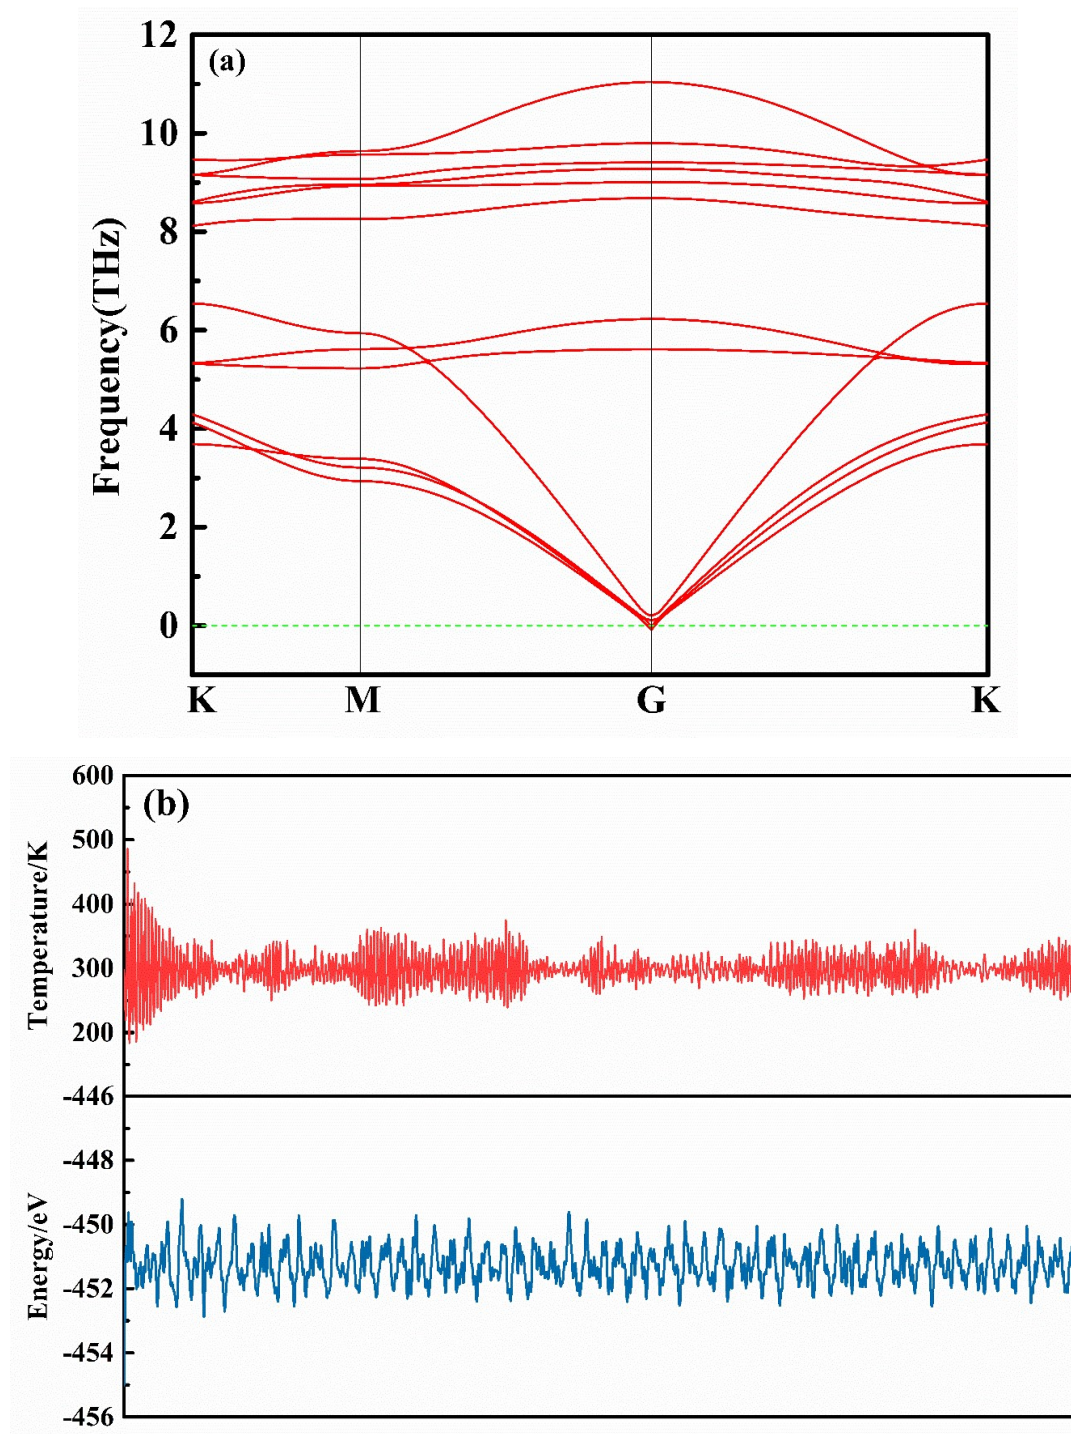

Fig. S3 Calculated density of states (DOS) of (a)PtS<sub>2</sub>/SnS<sub>2</sub>, (b)PtS<sub>2</sub>/SnSSe, (c) PtS<sub>2</sub>/SnSe<sub>2</sub>, (d) PtSSe/SnSe<sub>2</sub>, and (e) PtSe<sub>2</sub>/SnSe<sub>2</sub> vdWHs. The Fermi level is set at 0 eV.

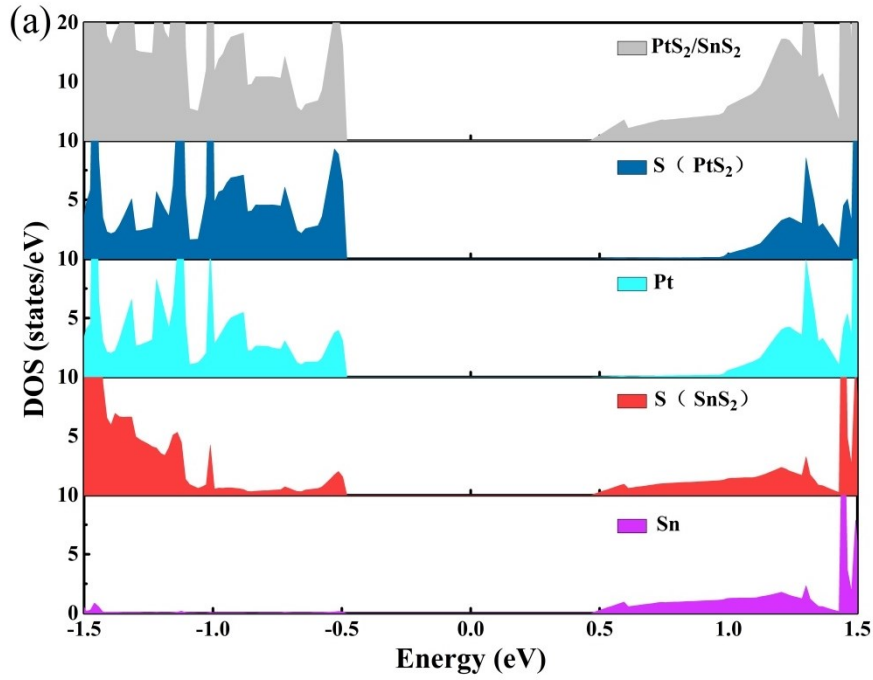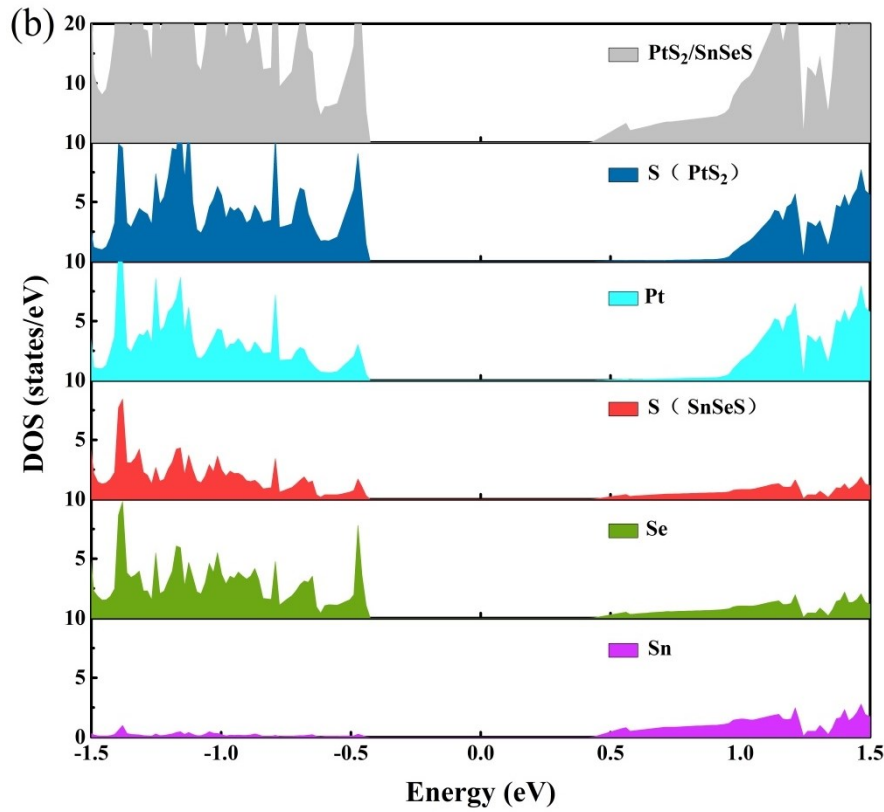

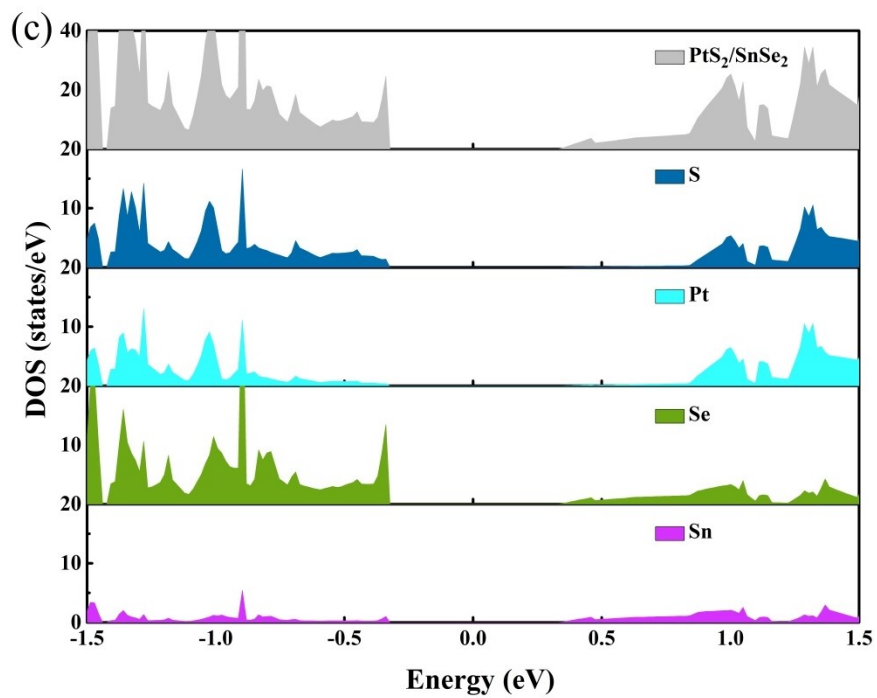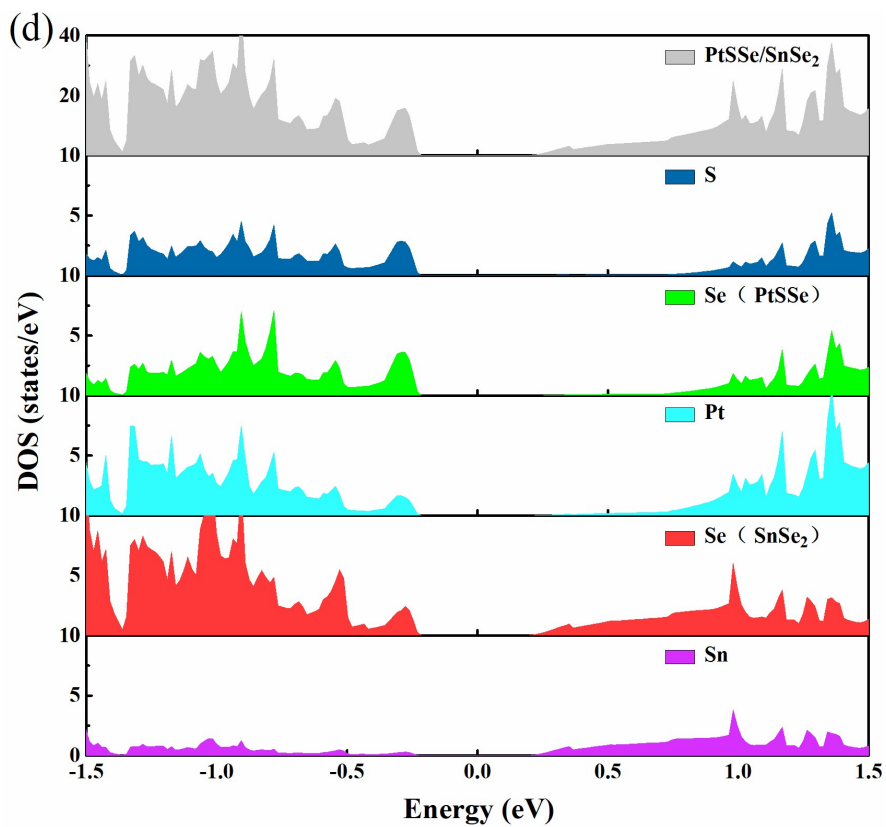

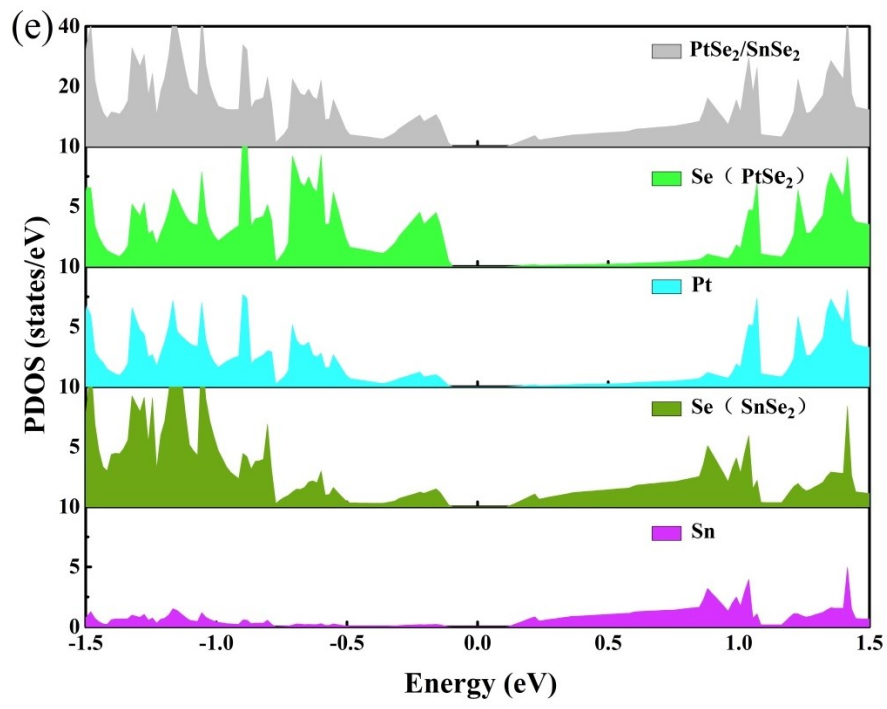

Fig. S4 optical absorption spectra of (a) PtSe<sub>2</sub> monolayer and SnSe<sub>2</sub> monolayer

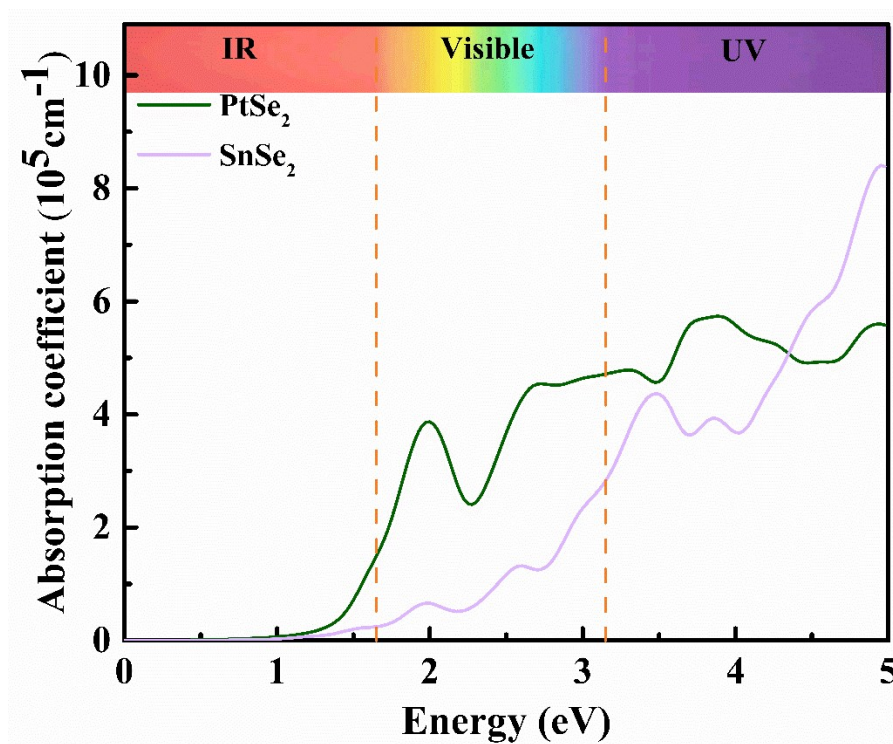

Supplement: d1cp01777b1.pdf [file d1cp01777b1.pdf]
